# Supplementary material for: Structural variants exhibit widespread allelic heterogeneity and shape variation in complex traits
Source: PubMed Central journal article supplement (PMC6814777; doi:10.1038/s41467-019-12884-1), 2019-10-25
Supplement: 41467_2019_12884_MOESM3_ESM.pdf [file 41467_2019_12884_MOESM3_ESM.pdf]

### **Description of Additional Supplementary Files**

File Name: Supplementary Data 1

Description: List of QTL candidate genes used in the enrichment analysis.

File Name: Supplementary Data 2

Description: *D. melanogaster* gene length summary, SV enrichment, and SV density.

File Name: Supplementary Data 3

Description: Summary of the Pacific Biosciences reads and assembly metrics.

File Name: Supplementary Data 4

Description: Gene length bins used in Figure 2a.
